# Supplementary material for: An aircraft gas chromatograph–mass spectrometer System for Organic Fast Identification Analysis (SOFIA): design, performance and a case study of Asian monsoon pollution outflow
Source: Copernicus journal article supplement (doi:10.5194/amt-10-5089-2017), 2017-12-22
Supplement: Supplementary file 1 [file amt-10-5089-2017-supplement.pdf]

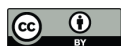

## *Supplement of*

# **An aircraft gas chromatograph–mass spectrometer System for Organic Fast Identification Analysis (SOFIA): design, performance and a case study of Asian monsoon pollution outflow**

**Efstratios Bourtsoukidis et al.**

*Correspondence to:* Efstratios Bourtsoukidis (e.bourtsoukidis@mpic.de)

The copyright of individual parts of the supplement might differ from the CC BY 4.0 License.

# Supplementary information

Wait sample

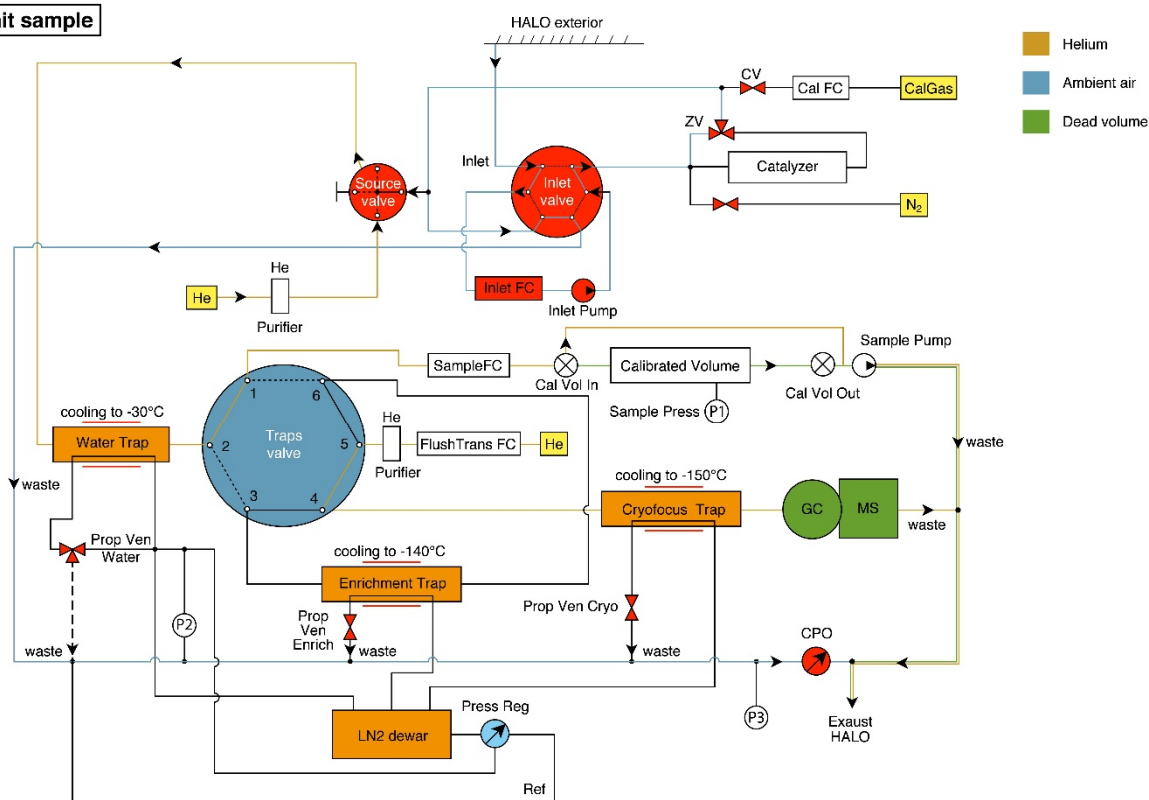

Sample

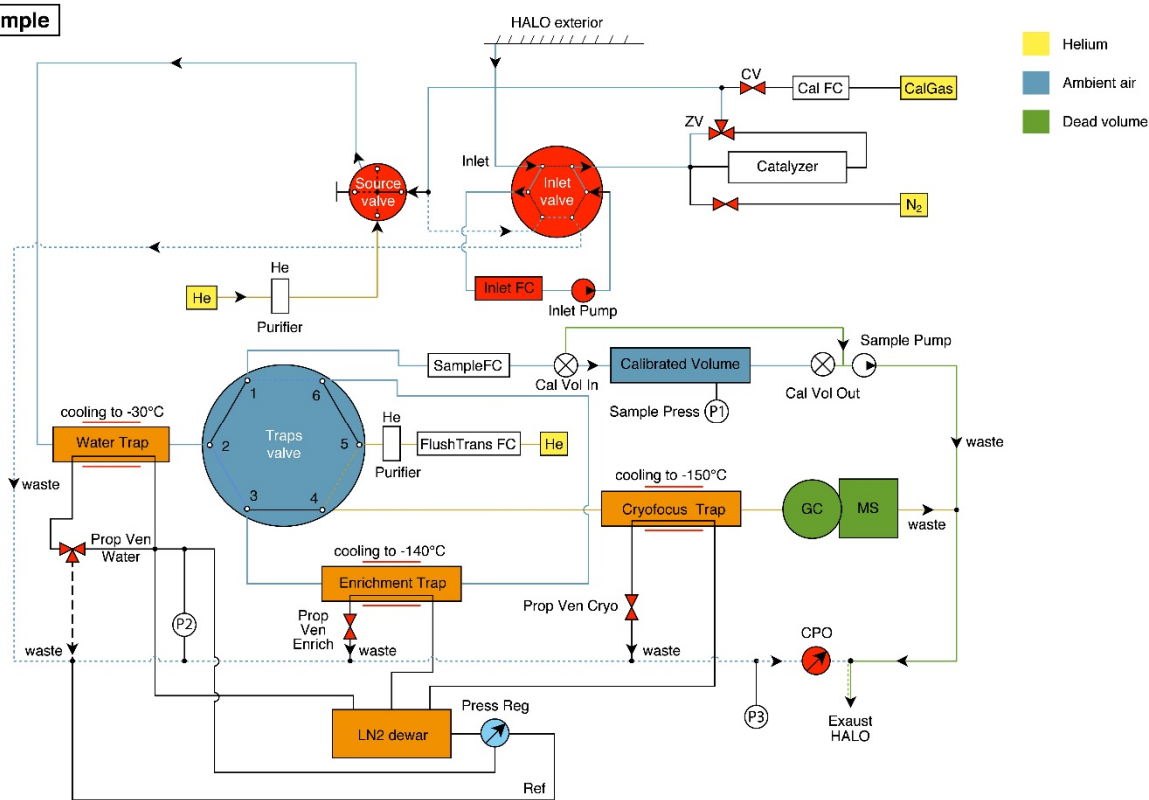

## Purge traps

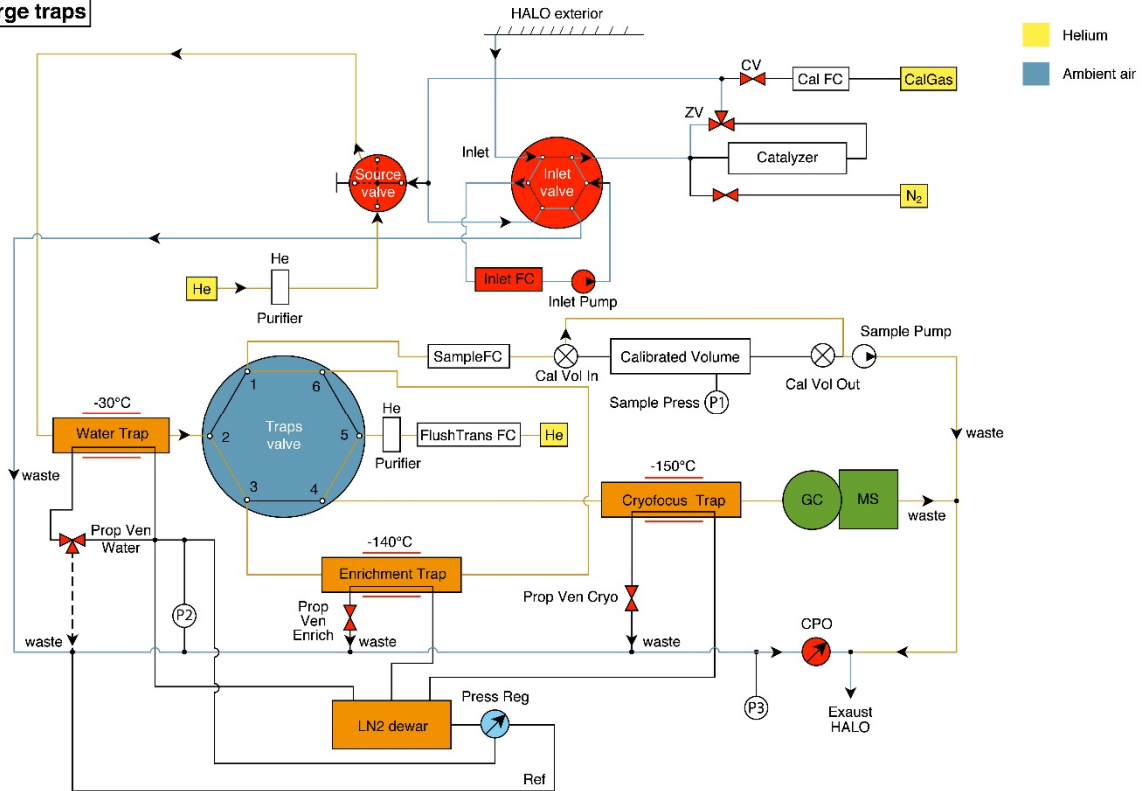

## Transfer Sample

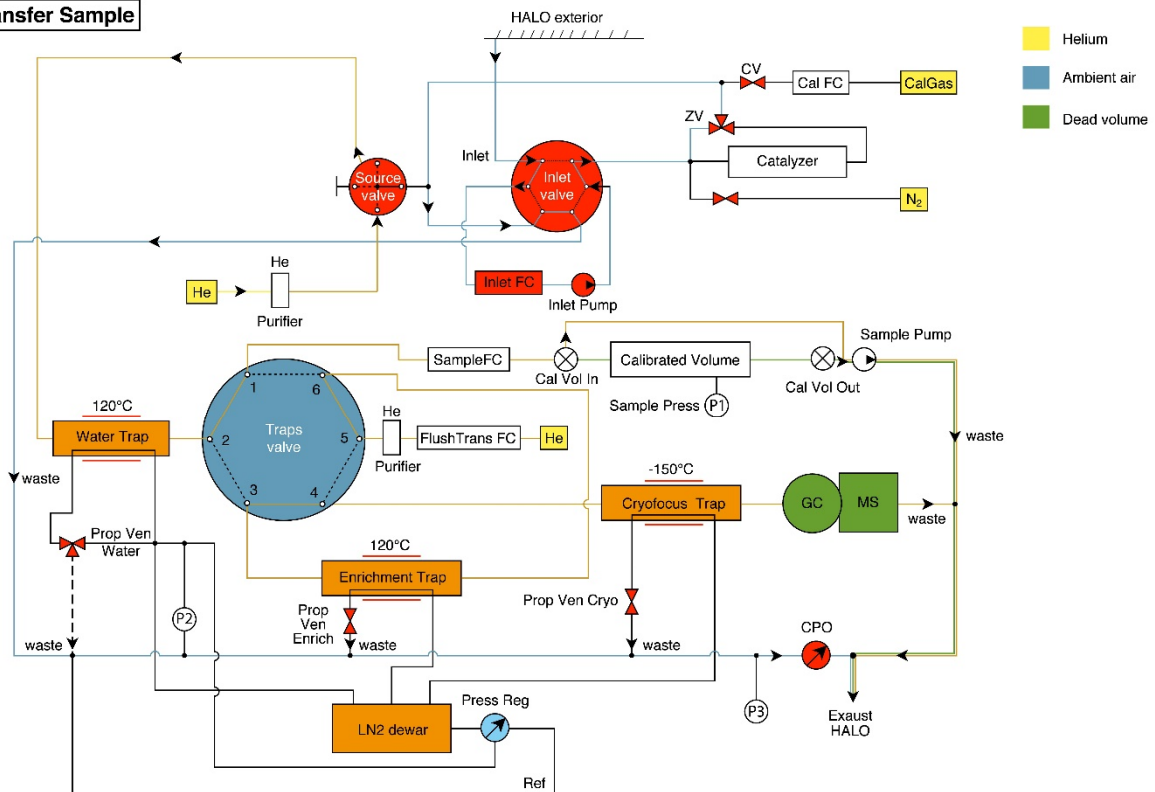

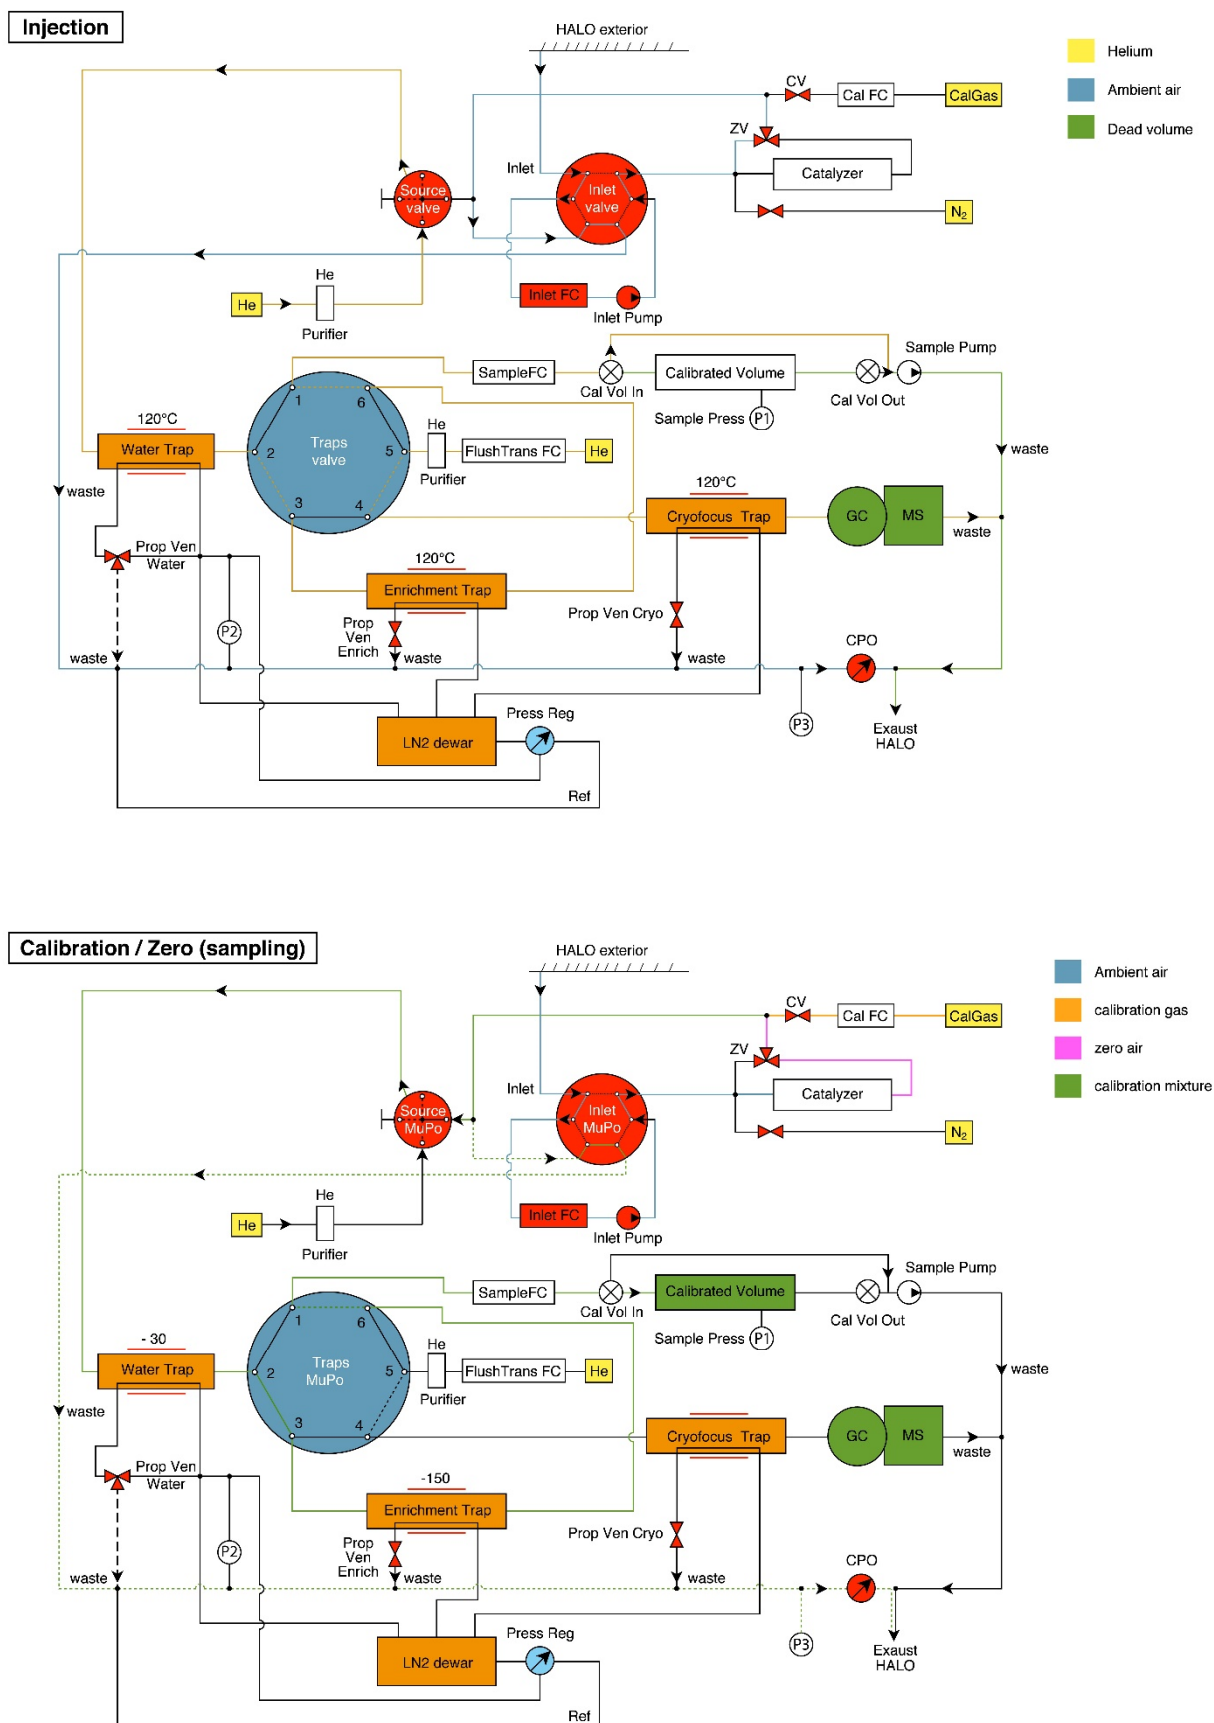

**Figure S1.** Diagrams of SOFIA illustrating the air flow paths during a complete cycle.

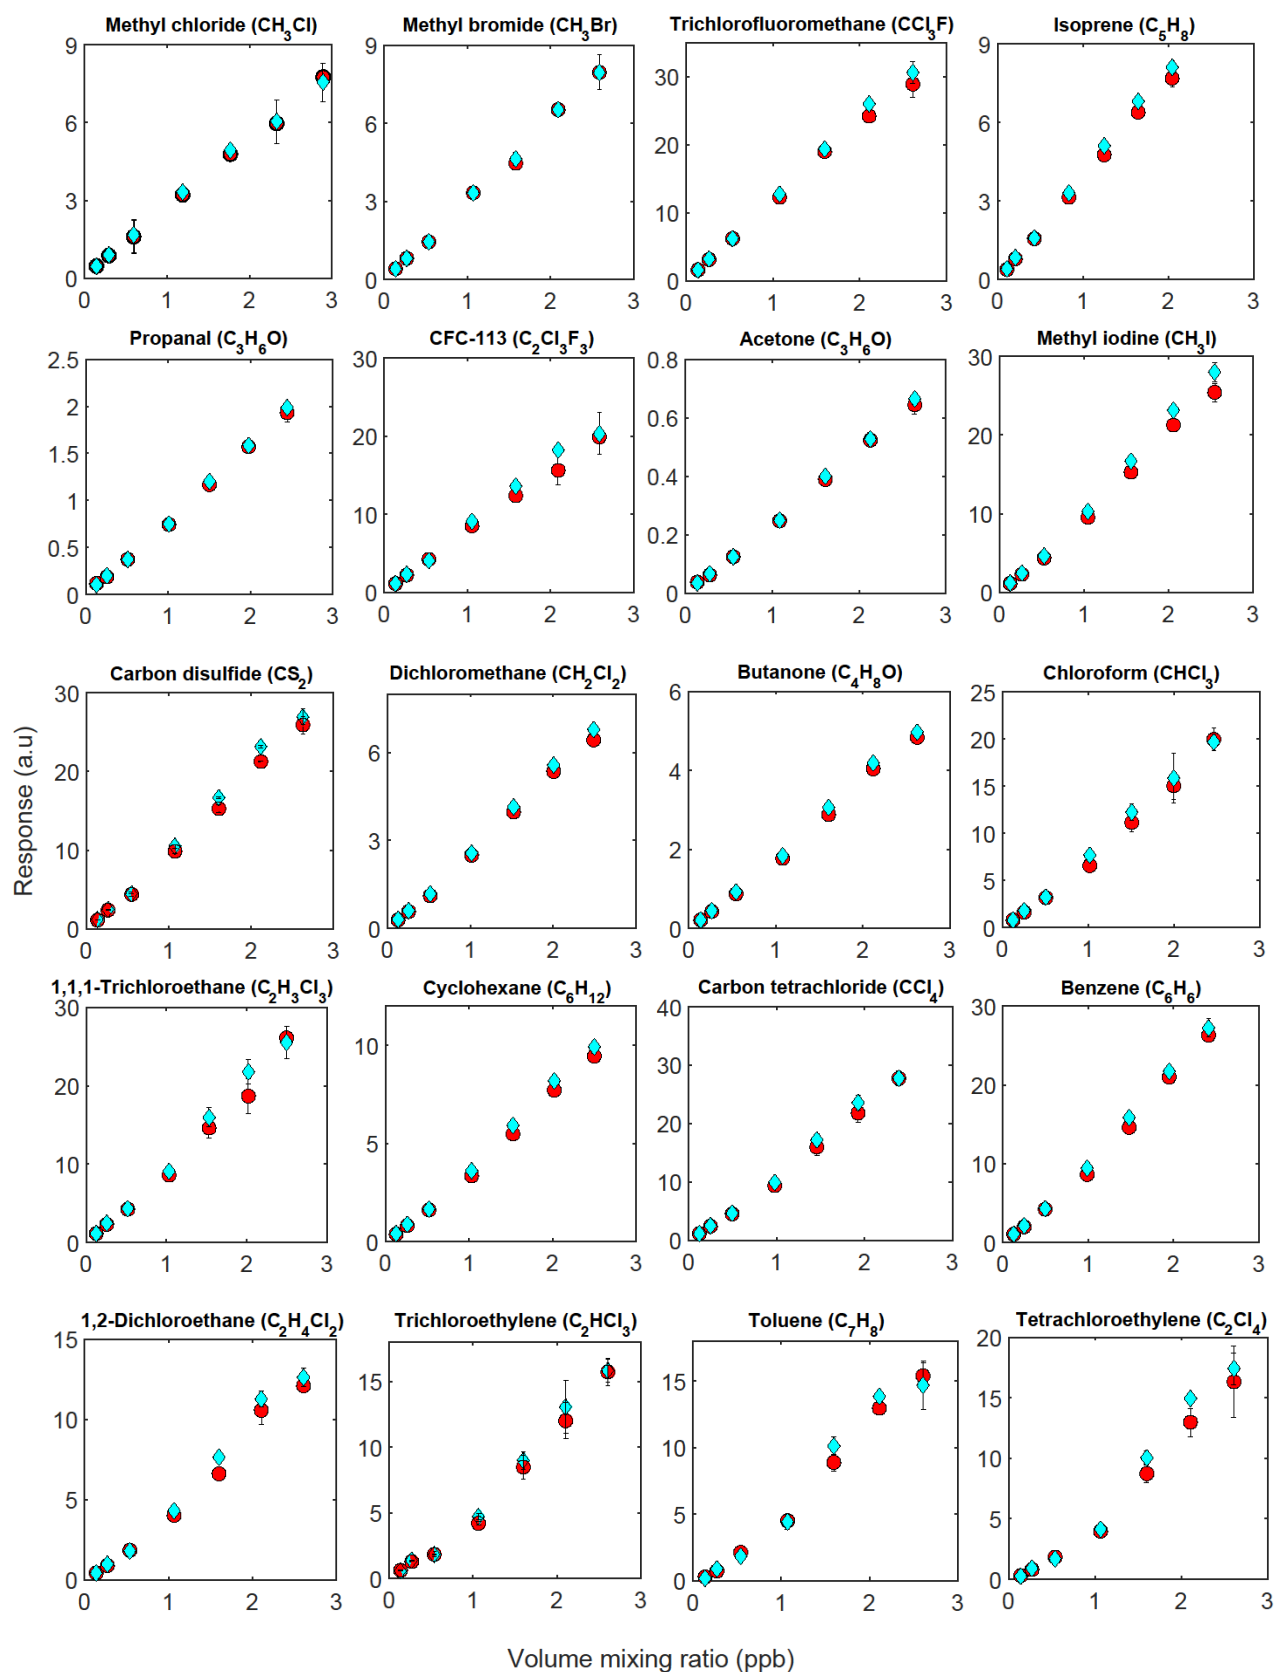

**Figure S2.** Calibration curves under dry (red circles) and wet (cyan diamonds) conditions. Each data point consists of 5 measurements and the standard deviation is indicated by the errorbars.

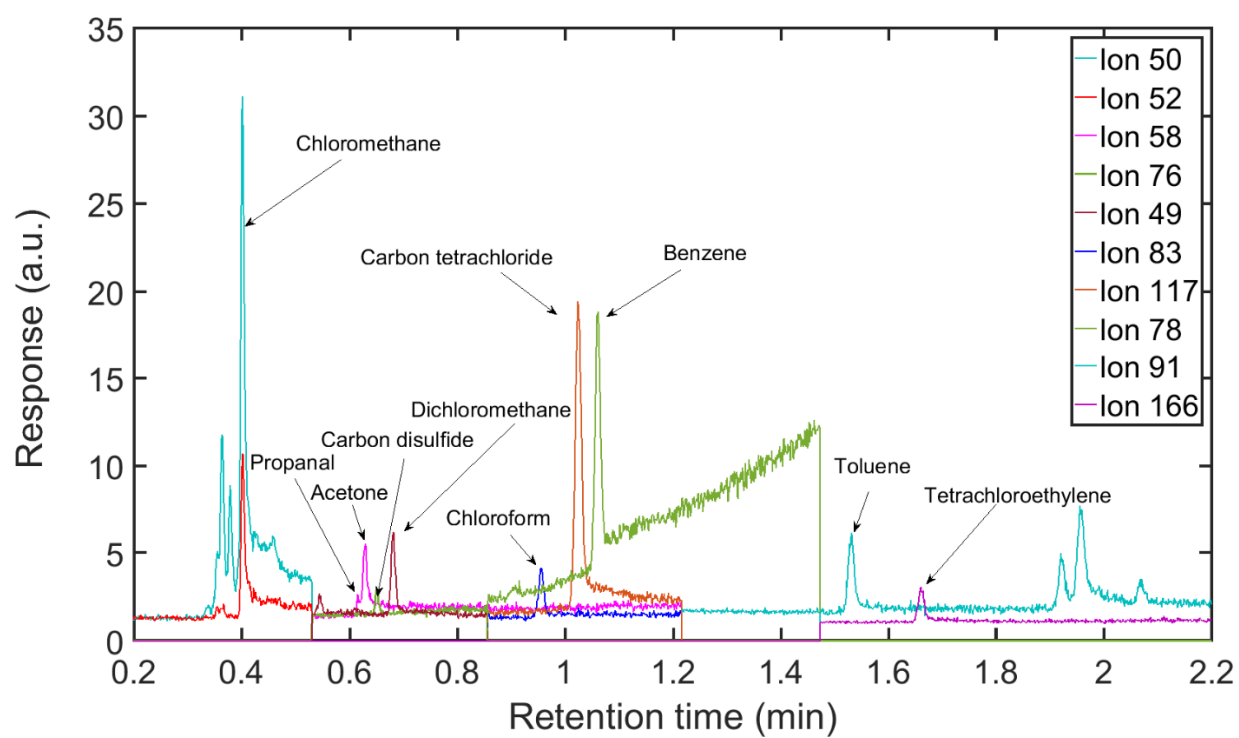

**Figure S3.** Ambient chromatogram obtained during OMO campaign.
